# Supplementary material for: Nr1d1 Mediated Cell Senescence in Mouse Heart-Derived Sca-1+CD31− Cells
Source: MDPI journal article supplement (doi:10.3390/ijms232012455), 2022-10-18
Supplement: s1 [file s1]

Table S1: Sequences of primers

| Primer                        | Forward primer 5' → 3'        | Reverse primer 5'→3'        |
|-------------------------------|-------------------------------|-----------------------------|
| <i>Nr1d1</i>                  | TGCTTAAGGCTGGCACCTT<br>TG     | GTAGGTTGTGCGGCTCAGGA<br>A   |
| <i>Dpt</i>                    | GAACTATGCCTGCATGCCTACA<br>C   | TCTTGCTATAGCGGCAGCAGTAA     |
| <i>Serpina3g</i>              | AGGCTGACCTGTCTGCAATCAC        | TGCACAACATCCGACACCTG        |
| <i>Nr4a3</i> (for<br>Q-PCR)   | CCCAAGTGTAACCAGAGTGGA<br>A    | GGAGACTCGGCCATTGAAAC        |
| <i>Il11</i>                   | TCGACTGTGACTCGGGACTG          | TGTGGGGCGGTTGTTTG           |
| <i>Polr2k</i>                 | AGATAAAGTCCAGGGATCCCA<br>TCAG | CCCACATTTTCATCGAGCATCA      |
| <i>Gapdh</i>                  | GCTGCCCAGAACATCATCC<br>CT     | TGAAGTCGCAGGAGACAACC        |
| <i>Nr4a3</i> (for RT-<br>PCR) | GGAGGGAAGATGGATGTA<br>GCC     | CGGAGGGAGGAGGAATGGA<br>C    |
| Oligo- <i>Nr4a3</i>           | caccGACTACACCAAGCTGA<br>CCA   | aaacTGGTCAGCTTGGTGTAGT<br>C |
| p-Tianj2                      | CGAGGGCCTATTTCCCATG<br>AT     | GCCAAAGTGGATCTCTGCTG        |
